# Supplementary material for: Association between Depression, Anxiety Symptoms, Bacteroides Stercoris Abundance in Stool and Functional Constipation: A Bidirectional Two-Sample Mendelian Randomization Analysis
Source: Research Square preprint supplement (doi:10.21203/rs.3.rs-4728583/v1), 2024-08-07
Supplement: Supplementary file 1 [file ad632accfd520371fc9ff851.xlsx]

## Sheet: Table S1
Table S1. The characteristics of all SNPs included in MR analysis estimating the causal effect of genetically predicted depression symptoms (exposure) on risk of functional constipation (outcome).
					Beta		SE		EAF		P-value		N
	SNP	Chr	EA	OA	exposure	outcome	exposure	outcome	exposure	outcome	exposure	outcome	exposure
1	rs10058289	5	G	A	0.0536	-0.0035	0.0111	0.012	0.4311	0.4311	1.25101e-06	0.7696	23424
2	rs10140802	14	T	C	-0.052	-0.0078	0.0112	0.0122	0.6278	0.6277	3.71903e-06	0.5199	23424
3	rs10880262	12	T	C	-0.0518	0.008	0.0109	0.0118	0.5076	0.5078	2.10499e-06	0.499001	23424
4	rs111399861	8	T	G	-0.1356	0.034	0.0293	0.0312	0.0405	0.04041	3.53802e-06	0.2766	23424
5	rs11159917	14	T	C	0.0599	-0.0116	0.0126	0.0138	0.2444	0.2442	2.12701e-06	0.3993	23424
6	rs113392839	7	A	G	0.3299	0.1128	0.0632	0.0677	0.007743	0.007742	1.75598e-07	0.0957194	23424
7	rs113661867	4	T	C	0.1389	0.0229	0.0272	0.0299	0.04085	0.0409	3.25402e-07	0.4447	23424
8	rs116127119	5	A	G	0.2373	-0.0312	0.051	0.0559	0.01218	0.01218	3.32897e-06	0.576901	23424
9	rs117020343	6	G	A	0.1352	0.0332	0.0269	0.0297	0.0422	0.04219	5.24602e-07	0.2634	23424
10	rs12491634	3	A	T	0.7329	0.2933	0.1595	0.1692	0.001734	0.001733	4.338e-06	0.0829507	23424
11	rs12491634	3	A	T	0.7329	0.0067	0.1595	0.019	0.001734	0.1085	4.338e-06	0.723701	23424
12	rs141654555	11	T	C	0.4577	-0.0015	0.0996	0.1093	0.003186	0.003195	4.33501e-06	0.9887	23424
13	rs145802336	14	A	G	0.1437	-0.0333	0.0298	0.0325	0.03772	0.0377	1.38599e-06	0.3052	23424
14	rs189504242	6	C	A	0.1773	0.0163	0.0373	0.0396	0.0232	0.02325	1.945e-06	0.6807	23424
15	rs2424608	20	G	C	-0.0718	-0.0243	0.0156	0.017	0.8571	0.8571	4.11604e-06	0.1535	23424
16	rs2507900	11	A	G	-0.0568	-0.0062	0.0121	0.0131	0.717	0.717	2.537e-06	0.633299	23424
17	rs3135293	6	C	T	-0.1359	0.0291	0.0276	0.0294	0.04773	0.04767	8.40292e-07	0.3212	23424
18	rs34004743	12	A	G	0.0647	0	0.0141	0.0153	0.1809	0.1809	4.70403e-06	0.9982	23424
19	rs367668091	18	G	A	0.182	0.0366	0.0396	0.0427	0.02022	0.02022	4.29497e-06	0.3905	23424
20	rs4329857	14	T	C	-0.0589	-0.002	0.0128	0.0139	0.2411	0.2411	4.19904e-06	0.8876	23424
21	rs4466264	6	A	T	0.0546	0.0199	0.0109	0.0118	0.4768	0.4769	5.96802e-07	0.092619	23424
22	rs4880603	10	T	G	0.0559	0.0291	0.0121	0.0132	0.2812	0.2814	4.06602e-06	0.0279499	23424
23	rs61857747	10	A	G	-0.0718	-0.0464	0.0157	0.017	0.1426	0.1426	4.56604e-06	0.00620898	23424
24	rs7164299	15	C	G	0.0646	-0.0005	0.0139	0.0151	0.1914	0.1915	3.211e-06	0.9729	23424
25	rs72662038	1	T	C	0.1158	0.0352	0.0235	0.0257	0.05673	0.05676	8.66303e-07	0.1716	23424
26	rs76895136	5	G	A	-0.2331	-0.0159	0.047	0.0498	0.01453	0.01451	7.04304e-07	0.75	23424
27	rs771122	1	C	T	-0.0935	-0.0289	0.0187	0.0203	0.9062	0.9062	5.64495e-07	0.1554	23424
28	rs8109725	19	T	C	-0.0841	-0.0106	0.0172	0.0186	0.8843	0.8843	9.94008e-07	0.5668	23424
29	rs9371564	6	G	A	-0.0576	-0.0188	0.0117	0.0127	0.6818	0.6818	8.21807e-07	0.1372	23424
30	rs9809577	3	A	C	-0.0787	-0.0061	0.0143	0.0156	0.8233	0.8233	3.31703e-08	0.6948	23424
Abbreviations: SNP = single-nucleotide polymorphism; Chr, chromosome; EA, effect allele; OA, other allele; SE, standard error; EAF, effect allele frequency; MR, Mendelian randomization.

## Sheet: Table S2
Table S2. The characteristics of all SNPs included in MR analysis estimating the causal effect of genetically predicted functional constipation (exposure) on risk of depression symptoms (outcome).
					Beta		SE		EAF		P-value		N
	SNP	Chr	EA	OA	exposure	outcome	exposure	outcome	exposure	outcome	exposure	outcome	exposure
1	rs114066486	2	G	A	0.1896	0.0335	0.0383	0.0353	0.02501	0.02505	7.23802e-07	0.3417	17246
2	rs115705533	4	C	T	0.5292	-0.0079	0.1151	0.1052	0.003004	0.003006	4.255e-06	0.9399	17246
3	rs117035577	6	G	A	0.1856	0.0745	0.0404	0.0369	0.02299	0.02297	4.43701e-06	0.0435903	17246
4	rs16923500	8	A	G	0.0698	0.0376	0.015	0.0139	0.1916	0.1917	3.472e-06	0.00687797	17246
5	rs17641419	14	G	C	-0.1654	-0.0073	0.0354	0.0324	0.02933	0.02937	3.06302e-06	0.8217	17246
6	rs181698614	8	G	C	0.2641	0.0793	0.0519	0.0481	0.01337	0.01334	3.64897e-07	0.0994008	17246
7	rs185003380	15	A	T	0.0907	0.0339	0.0166	0.0152	0.8262	0.8262	4.976e-08	0.0260202	17246
8	rs2006882	7	T	C	-0.0593	-0.0209	0.0129	0.0119	0.7004	0.7003	4.23399e-06	0.0793396	17246
9	rs28500475	17	C	A	-0.0557	-0.0083	0.0119	0.0109	0.4808	0.4809	2.67498e-06	0.4477	17246
10	rs34611177	2	T	A	0.1236	0.0006	0.026	0.024	0.05474	0.05467	2.054e-06	0.9789	17246
11	rs34862748	7	A	G	0.15	0.0364	0.0317	0.029	0.03804	0.03803	2.16098e-06	0.2087	17246
12	rs62508652	8	C	A	0.2599	0.0202	0.0543	0.0514	0.01257	0.01254	1.69099e-06	0.6939	17246
13	rs6580466	5	A	C	0.0561	-0.0008	0.0118	0.0109	0.5426	0.5424	2.19902e-06	0.9445	17246
14	rs72915126	18	A	G	-0.1652	0.0046	0.034	0.0312	0.03173	0.03175	1.17001e-06	0.883	17246
15	rs75460852	1	A	T	-0.1107	0.009	0.0236	0.0217	0.06851	0.06854	2.683e-06	0.6789	17246
16	rs75697108	7	G	T	0.1003	0.0516	0.0215	0.02	0.08439	0.08442	3.223e-06	0.00973711	17246
17	rs7610243	3	G	A	0.0628	-0.0145	0.0133	0.0123	0.7315	0.7314	2.45002e-06	0.2379	17246
18	rs9378968	6	G	A	0.0702	-0.0024	0.0153	0.0141	0.1801	0.1802	4.46303e-06	0.865	17246
19	rs9401256	6	C	G	0.0784	-0.0048	0.0159	0.0147	0.8352	0.8352	8.03804e-07	0.7416	17246
Abbreviations: SNP = single-nucleotide polymorphism; Chr, chromosome; EA, effect allele; OA, other allele; SE, standard error; EAF, effect allele frequency; MR, Mendelian randomization.

## Sheet: Table S3
Table S3. The characteristics of all SNPs included in MR analysis estimating the causal effect of genetically predicted anxiety symptoms (exposure) on risk of functional constipation (outcome).
					Beta		SE		EAF		P-value		N
	SNP	Chr	EA	OA	exposure	outcome	exposure	outcome	exposure	outcome	exposure	outcome	exposure
1	rs10120409	9	A	T	-0.0625	-0.0247	0.0129	0.0127	0.3416	0.3411	1.309e-06	0.0511305	20992
2	rs10492174	12	A	G	-0.0982	-0.0019	0.0209	0.0205	0.0925	0.09227	2.52098e-06	0.9263	20992
3	rs11245950	11	C	T	-0.0569	0.0148	0.0121	0.0119	0.4511	0.4516	2.72001e-06	0.215	20992
4	rs117203063	14	G	A	0.1591	-0.0347	0.0335	0.0328	0.03531	0.03541	2.016e-06	0.2892	20992
5	rs11729045	4	A	C	-0.1221	-0.0305	0.0232	0.0227	0.07449	0.07413	1.45801e-07	0.178	20992
6	rs13191326	6	G	A	-0.1106	0.0139	0.0235	0.023	0.07522	0.07441	2.45997e-06	0.5438	20992
7	rs17138385	16	T	C	0.0794	-0.0076	0.017	0.0167	0.1505	0.1507	2.94802e-06	0.6509	20992
8	rs17230547	21	C	T	0.1514	0.0286	0.0318	0.0313	0.03842	0.03826	1.95101e-06	0.3606	20992
9	rs17448197	3	C	T	-0.1068	-0.0505	0.0226	0.0222	0.07788	0.07761	2.28602e-06	0.0228202	20992
10	rs191169844	2	A	C	0.138	-0.0026	0.0296	0.0291	0.0537	0.05408	3.11702e-06	0.9277	20992
11	rs1933530	1	G	T	-0.067	-0.0081	0.0139	0.0136	0.2545	0.2547	1.32099e-06	0.5525	20992
12	rs2053503	3	C	G	0.0738	0.0257	0.0161	0.0157	0.1695	0.1692	4.60702e-06	0.102	20992
13	rs2193743	12	G	A	0.0687	-0.0061	0.0137	0.0135	0.263	0.2629	5.49895e-07	0.6494	20992
14	rs2993076	1	G	A	0.0589	0.0007	0.0127	0.0125	0.3374	0.3374	3.77798e-06	0.9544	20992
15	rs34919929	7	A	G	-0.0701	-0.0185	0.0133	0.013	0.7114	0.7114	1.44401e-07	0.155	20992
16	rs3761010	19	C	A	-0.0608	-0.014	0.0131	0.0129	0.313	0.3126	3.50002e-06	0.2766	20992
17	rs4335340	1	G	C	0.0727	0.0459	0.0153	0.015	0.1923	0.1927	2.13201e-06	0.00225398	20992
18	rs4861358	4	T	C	0.0717	0.0065	0.0146	0.0143	0.7809	0.7808	8.91107e-07	0.6466	20992
19	rs61693885	16	C	T	0.0598	0.0116	0.0122	0.012	0.5822	0.5825	1.02799e-06	0.3322	20992
20	rs61820769	1	T	C	-0.1629	-0.0404	0.0321	0.0315	0.03742	0.03743	3.80803e-07	0.1998	20992
21	rs62043045	16	G	A	0.0673	0.0146	0.0137	0.0134	0.2617	0.2618	8.55008e-07	0.2773	20992
22	rs62105810	2	T	C	0.0959	0.0322	0.0191	0.0187	0.1122	0.1124	5.53503e-07	0.0852491	20992
23	rs67774492	15	G	A	-0.0814	0.0005	0.0174	0.017	0.1424	0.1423	2.96599e-06	0.9789	20992
24	rs7237747	18	G	C	0.0583	0.022	0.0121	0.0119	0.4504	0.4507	1.536e-06	0.0637602	20992
25	rs72932627	11	A	G	0.0587	0.0094	0.0121	0.0118	0.5237	0.5242	1.217e-06	0.4287	20992
26	rs75528309	16	T	C	0.1465	-0.0211	0.0302	0.0294	0.04295	0.04293	1.23101e-06	0.4734	20992
27	rs7645712	3	A	T	-0.0786	0.0108	0.0159	0.0156	0.1852	0.1849	7.56397e-07	0.4863	20992
Abbreviations: SNP = single-nucleotide polymorphism; Chr, chromosome; EA, effect allele; OA, other allele; SE, standard error; EAF, effect allele frequency; MR, Mendelian randomization.

## Sheet: Table S4
Table S4. The characteristics of all SNPs included in MR analysis estimating the causal effect of genetically predicted functional constipation (exposure) on risk of anxiety symptoms (outcome).
					Beta		SE		EAF		P-value		N
	SNP	Chr	EA	OA	exposure	outcome	exposure	outcome	exposure	outcome	exposure	outcome	exposure
1	rs114066486	2	G	A	0.1896	0.0377	0.0383	0.0389	0.02501	0.02503	7.23802e-07	0.3326	17246
2	rs115705533	4	C	T	0.5292	-0.0471	0.1151	0.1173	0.003004	0.002976	4.255e-06	0.6878	17246
3	rs117035577	6	G	A	0.1856	0.0721	0.0404	0.0409	0.02299	0.02293	4.43701e-06	0.0776605	17246
4	rs16923500	8	A	G	0.0698	0.0084	0.015	0.0154	0.1916	0.1917	3.472e-06	0.5837	17246
5	rs17641419	14	G	C	-0.1654	-0.0652	0.0354	0.0361	0.02933	0.0293	3.06302e-06	0.0705099	17246
6	rs181698614	8	G	C	0.2641	0.07	0.0519	0.0537	0.01337	0.01327	3.64897e-07	0.1918	17246
7	rs185003380	15	A	T	0.0907	0.0146	0.0166	0.0166	0.8262	0.8262	4.976e-08	0.3796	17246
8	rs2006882	7	T	C	-0.0593	-0.0082	0.0129	0.0132	0.7004	0.7008	4.23399e-06	0.5345	17246
9	rs28500475	17	C	A	-0.0557	-0.0079	0.0119	0.0121	0.4808	0.4813	2.67498e-06	0.5141	17246
10	rs34611177	2	T	A	0.1236	0.0424	0.026	0.0266	0.05474	0.05475	2.054e-06	0.1108	17246
11	rs34862748	7	A	G	0.15	0.0079	0.0317	0.0324	0.03804	0.03771	2.16098e-06	0.8069	17246
12	rs62508652	8	C	A	0.2599	-0.0051	0.0543	0.0564	0.01257	0.01254	1.69099e-06	0.9285	17246
13	rs6580466	5	A	C	0.0561	0.0226	0.0118	0.0121	0.5426	0.5426	2.19902e-06	0.0625806	17246
14	rs72915126	18	A	G	-0.1652	0.0073	0.034	0.0346	0.03173	0.03177	1.17001e-06	0.8337	17246
15	rs75460852	1	A	T	-0.1107	-0.0327	0.0236	0.0239	0.06851	0.0687	2.683e-06	0.1718	17246
16	rs75697108	7	G	T	0.1003	0.0414	0.0215	0.022	0.08439	0.08463	3.223e-06	0.0598205	17246
17	rs7610243	3	G	A	0.0628	-0.0147	0.0133	0.0136	0.7315	0.731	2.45002e-06	0.2796	17246
18	rs9378968	6	G	A	0.0702	0.0009	0.0153	0.0156	0.1801	0.1803	4.46303e-06	0.9548	17246
19	rs9401256	6	C	G	0.0784	-0.0042	0.0159	0.0162	0.8352	0.835	8.03804e-07	0.7951	17246
Abbreviations: SNP = single-nucleotide polymorphism; Chr, chromosome; EA, effect allele; OA, other allele; SE, standard error; EAF, effect allele frequency; MR, Mendelian randomization.

## Sheet: Table S5
Table S5. The characteristics of all SNPs included in MR analysis estimating the causal effect of genetically predicted Bacteroides stercoris abundance in stool (exposure) on risk of functional constipation(outcome).
					Beta		SE		EAF		P-value		N
	SNP	Chr	EA	OA	exposure	outcome	exposure	outcome	exposure	outcome	exposure	outcome	exposure
1	rs10239497	7	T	C	0.102572	0.0083	0.0206104	0.0124	0.340391	0.3469	6.49995e-07	0.5048	NA
2	rs12466602	2	T	C	0.167151	0.0312	0.0361154	0.0219	0.0792179	0.07972	3.69999e-06	0.1552	NA
3	rs143341697	4	T	C	0.311224	0.0193	0.0630713	0.0376	0.02503	0.02854	8e-07	0.607	NA
4	rs2856007	3	C	T	0.10896	0.018	0.0233246	0.014	0.22715	0.2286	2.99999e-06	0.2013	NA
5	rs569404087	7	A	G	0.221517	0.024	0.0463541	0.0284	0.0463448	0.04528	1.79999e-06	0.3986	NA
6	rs7352812	20	T	C	0.440534	0.1207	0.0962527	0.053	0.0104539	0.01479	4.70002e-06	0.0228502	NA
7	rs7701143	5	A	G	0.0937675	0.0315	0.0200785	0.0122	0.377511	0.3816	2.99999e-06	0.01007	NA
8	rs9293681	5	C	T	-0.126687	0.0045	0.0229242	0.0135	0.252334	0.2662	3.29997e-08	0.7403	NA
9	rs955259	9	C	T	0.214371	0.0082	0.0465117	0.03	0.0460515	0.0409	4e-06	0.783599	NA
Abbreviations: SNP = single-nucleotide polymorphism; Chr, chromosome; EA, effect allele; OA, other allele; SE, standard error; EAF, effect allele frequency; MR, Mendelian randomization; NA, not available.

## Sheet: Table S6
Table S6. The characteristics of all SNPs included in MR analysis estimating the causal effect of genetically predicted functional constipation (exposure) on risk of Bacteroides stercoris abundance in stool (outcome).
					Beta		SE		EAF		P-value		N
	SNP	Chr	EA	OA	exposure	outcome	exposure	outcome	exposure	outcome	exposure	outcome	exposure
1	rs114066486	2	G	A	0.1896	-0.127049	0.0600432	0.0600432	0.02501	0.027965	7.23802e-07	0.0340001	17246
2	rs117035577	6	G	A	0.1856	-0.0612885	0.0656856	0.0656856	0.02299	0.0225801	4.43701e-06	0.35	17246
3	rs16923500	8	A	G	0.0698	0.0127474	0.0252544	0.0252544	0.1916	0.181772	3.472e-06	0.61	17246
4	rs17641419	14	G	C	-0.1654	-0.0124477	0.0570735	0.0570735	0.02933	0.03039	3.06302e-06	0.83	17246
5	rs181698614	8	G	C	0.2641	-0.0517329	0.0850621	0.0850621	0.01337	0.0130581	3.64897e-07	0.54	17246
6	rs2006882	7	T	C	-0.0593	0.00324603	0.0214414	0.0214414	0.7004	0.710279	4.23399e-06	0.88	17246
7	rs28500475	17	C	A	-0.0557	0.00722011	0.0196506	0.0196506	0.4808	0.482412	2.67498e-06	0.709999	17246
8	rs34611177	2	T	A	0.1236	0.038038	0.0432613	0.0432613	0.05474	0.0520868	2.054e-06	0.38	17246
9	rs34862748	7	A	G	0.15	0.0400413	0.056139	0.056139	0.03804	0.0327308	2.16098e-06	0.48	17246
10	rs62508652	8	C	A	0.2599	0.0933227	0.0926084	0.0926084	0.01257	0.0114652	1.69099e-06	0.31	17246
11	rs6580466	5	A	C	0.0561	-0.0247332	0.0197972	0.0197972	0.5426	0.559953	2.19902e-06	0.21	17246
12	rs72915126	18	A	G	-0.1652	0.01862	0.0571483	0.0571483	0.03173	0.0304878	1.17001e-06	0.74	17246
13	rs75460852	1	A	T	-0.1107	-0.0140359	0.0398406	0.0398406	0.06851	0.0644475	2.683e-06	0.719999	17246
14	rs75697108	7	G	T	0.1003	-0.0271729	0.0377616	0.0377616	0.08439	0.0753048	3.223e-06	0.47	17246
15	rs7610243	3	G	A	0.0628	0.0177232	0.0218132	0.0218132	0.7315	0.728051	2.45002e-06	0.42	17246
16	rs9378968	6	G	A	0.0702	0.00918086	0.0250984	0.0250984	0.1801	0.181688	4.46303e-06	0.709999	17246
17	rs9401256	6	C	G	0.0784	0.000286536	0.0267509	0.0267509	0.8352	0.840649	8.03804e-07	0.99	17246
Abbreviations: SNP = single-nucleotide polymorphism; Chr, chromosome; EA, effect allele; OA, other allele; SE, standard error; EAF, effect allele frequency; MR, Mendelian randomization.
